# Supplementary material for: Tumor Growth Remains Refractory to Myc Ablation in Host Macrophages
Source: MDPI journal article supplement (doi:10.3390/cells11244104), 2022-12-17
Supplement: s1 [file s1]

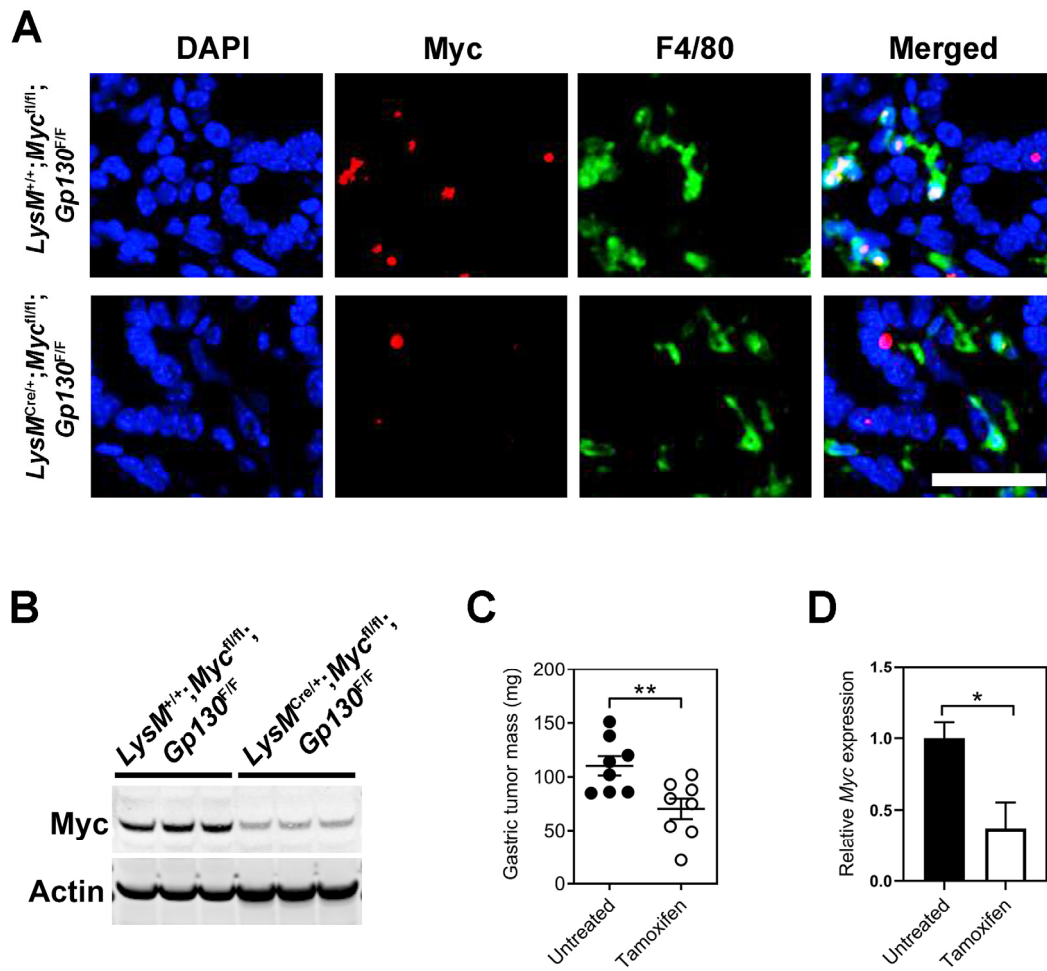

**Supplementary Figure S1. Epithelial-specific ablation of *Myc* reduces gastric tumor growth in *Gp130<sup>F/F</sup>* mice.** (A) Representative immunofluorescence staining for Myc and F4/80<sup>+</sup> TAMs in gastric tumors of *LysM<sup>+/+</sup>;Myc<sup>fl/fl</sup>;Gp130<sup>F/F</sup>* and *LysM<sup>Cre/+</sup>;Myc<sup>fl/fl</sup>;Gp130<sup>F/F</sup>* mice. DAPI was used to visualize nuclei. Scale bar: 50  $\mu$ m. (B) Western blot analysis of Myc expression in gastric tumors of *LysM<sup>+/+</sup>;Myc<sup>fl/fl</sup>;Gp130<sup>F/F</sup>* and *LysM<sup>Cre/+</sup>;Myc<sup>fl/fl</sup>;Gp130<sup>F/F</sup>* mice. Actin was used as a loading control. Each lane represents an individual mouse. (C) Mass of gastric tumors in *Tff1<sup>CreERT2</sup>;Myc<sup>fl/fl</sup>;Gp130<sup>F/F</sup>* mice following treatment with tamoxifen to ablate Myc expression in stomach epithelial cells. Each symbol represents an individual mouse.  $n = 8$  mice per group. (D) *Myc* gene expression in gastric tumors of *Tff1<sup>CreERT2</sup>;Myc<sup>fl/fl</sup>;Gp130<sup>F/F</sup>* mice following treatment with tamoxifen (1mg/mL per dose; 2 doses a day over 3 consecutive days) to ablate *Myc* expression in stomach epithelial cells. Mice were euthanized 7 days following the last tamoxifen injection.  $n \geq 6$  mice per group. Data represent mean  $\pm$  SEM; \*  $p < 0.05$ , \*\*  $p < 0.01$ , with statistical significance determined by an unpaired Student's *t*-test.
